# Supplementary material for: Nivolumab after selective internal radiation therapy for the treatment of hepatocellular carcinoma: a phase 2, single-arm study
Source: PubMed Central journal article supplement — J Immunother Cancer. 2022 Nov 30;10(11):e005457. doi: 10.1136/jitc-2022-005457 (PMC9716796; doi:10.1136/jitc-2022-005457), 2022-11-30

## Supplemental Materials

|                                                                                                                        |           |
|------------------------------------------------------------------------------------------------------------------------|-----------|
| <b>Supplemental Methods</b>                                                                                            | <b>2</b>  |
| Participating centers                                                                                                  | 2         |
| Inclusion and exclusion criteria                                                                                       | 2         |
| <b>SIRT procedure</b>                                                                                                  | <b>4</b>  |
| <b>Secondary study endpoints and additional sample size considerations</b>                                             | <b>5</b>  |
| <b>Requisites for continuing treatment with Nivolumab beyond progression.</b>                                          | <b>5</b>  |
| <b>References</b>                                                                                                      | <b>5</b>  |
| <b>Supplemental Tables</b>                                                                                             | <b>7</b>  |
| <b>Table S1. Characteristics of the SIRT procedure.</b>                                                                | 7         |
| <b>Table S2. Individual events leading to nivolumab dose delays observed in 18 patients.</b>                           | 9         |
| <b>Table S3. Individual adverse events that led to a permanent discontinuation of nivolumab in 6 patients.</b>         | 11        |
| <b>Table S4. Immune-mediated AEs (IMAE) requiring corticosteroids observed in 8 patients.</b>                          | 12        |
| <b>Table S5. Response rate by investigator-assessed RECIST 1.1 criteria according to baseline characteristics.</b>     | 13        |
| <b>Table S6. Time to progression and overall survival according to patient and treatment baseline characteristics.</b> | 15        |
| <b>Supplemental figures</b>                                                                                            | <b>16</b> |
| <b>Figure S1. Waterfall plot showing maximum changes in tumor size of target lesions.</b>                              | 16        |
| <b>Figure S2. Time to progression per investigator assessment according to baseline tumor burden.</b>                  | 17        |
| <b>Figure S3. Time to progression per investigator assessment according to Y90 activity calculation.</b>               | 18        |
| <b>Figure S4. Time to progression per investigator assessment according to baseline AFP.</b>                           | 19        |
| <b>Figure S5. Progression-free survival per investigator assessment.</b>                                               | 20        |
| <b>Figure S6. Overall survival according to baseline AFP levels.</b>                                                   | 21        |
| <b>Figure S7. Overall survival according to the aim of Y90 activity calculation.</b>                                   | 22        |

## Supplemental Methods

### Participating centers

Clínica Universidad de Navarra, Pamplona, Spain.  
Hospital Universitario 12 de Octubre, Madrid, Spain.  
Hospital Universitario Donostia, San Sebastián, Spain.  
Hospital Clínic, Barcelona, Spain.  
Hospital Universitario Central de Asturias, Oviedo, Spain.  
Hospital General Universitario Gregorio Marañón, Madrid, Spain.  
Hospital Clínico Universitario Lozano Blesa, Zaragoza, Spain.  
Hospital Universitario Ramón y Cajal, Madrid, Spain.  
Hospital de Cruces, Baracaldo, Spain.

### Inclusion and exclusion criteria

#### *Inclusion Criteria*

- Willing, able and mentally competent to provide written informed consent.
- Age 18 or more
- Diagnosis of HCC based on histology or non-invasive criteria if cirrhotics. Histological confirmation of hepatocellular carcinoma will be attempted prior to SIRT.
- Absence of extrahepatic disease (regional lymph nodes smaller than 2 cm in the short axis will not be considered extrahepatic disease).
- No suitability for liver resection, transplantation, or percutaneous ablation because of tumor location or size, age, comorbidities, or others
- Considered not good candidates for TACE based on:
  - Single tumors larger than 5 cm. Unsuitability for TACE in patients with single tumors of size between 5 and 10 cm will follow local practice.
  - Multiple tumors that cannot be targeted superselectively. These patients should be in the BCLC-B2 substage proposed by Bolondi et al (3). In summary, they should fall within the up-to-7 rule (the sum of the number of tumors and the maximal size of the largest lesion in cm should be higher than 7). Unsuitability for TACE will follow local practice.
  - Unilobar tumors with segmental or lobar portal vein thrombosis. Patients that have a small burden of disease (< 10% of the total tumor burden) in the contralateral lobe may be treated at the discretion of the site Principal Investigator
- Child-Pugh class A.
- Eastern Cooperative Oncology Group (ECOG) Performance Status of 0 to 1.
- Noninfected or active chronic HCV or HBV infection. Subjects with chronic HBV infection must have HBV DNA viral load < 500 IU/mL before SIRT and should be on effective antiviral therapy. If not on antiviral therapy at screening, then the subject must initiate treatment at the time of consent should have HBV DNA viral load < 1000 IU/mL before SIRT. All subjects enrolled in the HBV cohort must continue antiviral therapy through Follow-up Visit.
- At least one measurable lesion by RECIST 1.1 criteria.
  - Lesions previously treated by percutaneous ablation or TACE may be treated provided they have an active tumor volume that could be measured for tumor response evaluation (tumors with a rim of active contrast-enhanced tumor tissue are not considered measurable).
  - Tumor lesions should be  $\geq 10$  mm and malignant lymph nodes must be  $> 15$  mm on short axis. Additional details are included in Appendix 3.
  - Bone metastases are not considered measurable lesions, unless there is a measurable soft tissue component per RECIST1.1.
- Subjects must consent to perform a tumor biopsy that allows the acquisition of a tumor sample for performance of correlative studies. If adequate tissue is not obtained during the first procedure then a repeat biopsy should be considered based on the investigator's assessment of clinical risk. However, a repeat biopsy is not required to meet eligibility.

Adequate organ and marrow function as evidenced by:

- WBC  $\geq 2000/\mu\text{L}$  (stable, off any growth factor within 4 weeks of study drug administration)

- Neutrophils  $\geq 1000/\mu\text{L}$  (stable, off any growth factor within 4 weeks of study drug administration)
  - Platelets  $\geq 60 \times 10^3/\mu\text{L}$  (transfusion to achieve this level is not permitted)
  - Hemoglobin  $\geq 9.0 \text{ g/dL}$  (may be transfused to meet this requirement)
  - Creatinine CrCl  $>40 \text{ mL/min}$  (Cockcroft-Gault formula)
  - AST and ALT  $\leq 5 \times \text{ULN}$
  - Bilirubin  $\leq 2 \text{ mg/dL}$
  - INR  $\leq 1.8$  (for patients under oral anticoagulants this criterion should be met while on LMWH)
  - Albumin  $\geq 3.0 \text{ g/dL}$
- Women of childbearing potential (WOCBP) must have a negative serum or urine pregnancy test (minimum sensitivity 25 IU/L or equivalent units of HCG) within 24 hours prior to the start of study drug.
  - Women must not be breastfeeding.
  - Males who are sexually active with WOCBP must agree to follow instructions for method(s) of contraception for the duration of treatment with study drug plus 5 half-lives of study drug plus 90 days (duration of sperm turnover) for a total of 31 weeks post-treatment completion.
  - Azoospermic males and WOCBP who are continuously not heterosexually active are exempt from contraceptive requirements. However, they must still undergo pregnancy testing as described in this section.
  - WOCBP must agree to follow instructions for method(s) of contraception from the time of enrollment for the duration of treatment with study drug plus 5 half-lives of study drug plus 30 days (duration of ovulatory cycle) for a total of 23 weeks post treatment completion.

#### *Exclusion Criteria*

- Subjects with suspected brain metastasis are excluded, unless a brain MRI/CT is negative for metastasis.
- Patients in the Child-Pugh classes B or C
- Any history of hepatic encephalopathy
- Any prior (within 6 months) clinically detected ascites or any current ascites, even if controlled with diuretics (a minor peri-hepatic rim of ascites detected at imaging is acceptable.)
- Any history of clinically meaningful variceal bleeding within the last three months.
- Active coinfection with both hepatitis B and C (as defined by detectable HBV-DNA and HCV-RNA).
- Hepatitis D infection in subjects with hepatitis B
- Occlusive main trunk portal vein thrombosis (malignant or benign) or absence of intrahepatic portal blood flow by Doppler-Ultrasound if patient carries a portocaval shunt (percutaneous or surgical).
- Prior malignancy active within the previous 3 years except for locally curable cancers that have been apparently cured, such as basal or squamous cell skin cancer, prostate cancer without evidence of PSA progression or carcinoma in situ such as the following: gastric, prostate, cervix, colon, melanoma, or breast for example.
- Subjects with any active autoimmune disease that may require immunosuppressive therapy. Subjects with vitiligo, resolved childhood asthma/atopy, type I diabetes mellitus, residual hypothyroidism due to autoimmune condition only requiring hormone replacement, psoriasis not requiring systemic treatment, or conditions not expected to recur in the absence of an external trigger are permitted to enroll.
- Uncontrolled or clinically significant cardiac disease
- Known to be positive test for human immunodeficiency virus (HIV) or acquired immunodeficiency syndrome (AIDS)
- Prior therapy with an anti-PD-1, anti-PD-L1, anti-PD-L2, anti-CD137, or anti-CTLA-4 antibody (or any other antibody or drug specifically targeting T-cell costimulation or checkpoint pathways)
- Prior organ allograft or allogeneic bone marrow transplantation
- All toxicities attributed to prior anti-cancer therapy must have resolved to Grade 1 (NCI CTCAE version 4) or baseline before SIRT. Subjects with toxicities attributed to prior anti-cancer therapy which are not expected to resolve and result in long lasting sequelae are not permitted to enroll.

- Active bacterial or fungal infections requiring systemic treatment within 7 days
  - Use of other investigational drugs (drugs not marketed for any indication) within 28 days or at least 5 half-lives (whichever is longer) before SIRT.
  - Known or underlying medical condition that, in the Investigator's opinion, would make the administration of study drug hazardous to the subjects or obscure the interpretation of toxicity determination or adverse events.
  - Subjects with a condition requiring systemic treatment with either corticosteroids (> 10 mg daily prednisone equivalents) or other immunosuppressive medications within 14 days of study drug administration. Inhaled or topical steroids and adrenal replacement doses > 10 mg daily prednisone equivalents are permitted in the absence of active autoimmune disease.
  - Laboratory evidence of any underlying medical conditions that, in the Investigator's opinion, will make the administration of study drug hazardous or obscure the interpretation of toxicity determination or adverse events.
  - History of severe hypersensitivity reactions to other monoclonal antibodies.
  - History of allergy to study drug components.
  - WOCBP who are pregnant or breastfeeding
- Women with a positive pregnancy test at enrollment or prior to administration of study medication

### SIRT procedure

The entire SIRT procedure comprises a baseline mapping angiogram to determine the vascular anatomy of the liver, select the sites where SIR-Spheres will be released and coil-embolize gastrointestinal collaterals if needed. A nuclear medicine scan is performed after the injection of <sup>99m</sup>Tc-macroaggregated albumin (MAA) injection in the selected sites. This scan allows to calculate the liver-to-lung shunting, detect extrahepatic deposition of radioactivity and assess the degree of preferential uptake of MAA by liver tumors as compared to non-tumoral liver. Lung-shunt in excess of 20% and extrahepatic deposition of MAA were considered a technical contraindication to SIRT. In the absence of technical contraindications, actual injection of SIR-Spheres was performed the same day, once the SIR-Spheres activity was calculated and prescribed. Sequential treatment was not permitted in this study.

The method used to calculate the activity of SIR-Spheres was based on the presentation of hepatic lesions, is explained in detail in the study protocol and is founded in prior experience [1,2]. SIRT was always performed as selectively as possible. If the tumor burden involved both lobes of the liver, either whole-liver or more selective SIRT were possible at the discretion of the team based on the vascular anatomy, and the decision was made on a case-by-case basis. For whole liver treatments, the BSA method was used to calculate the prescribed activity of SIR-Spheres Y-90 using the following formula: Dose activity [GBq] = (BSA - 0.2) + (Vtumor / VTotalLiver), where Vtumor = volume of tumor; VTotalLiver = total liver volume, including tumor. Selective catheterization of individual branches was always attempted instead of a single injection via the common hepatic artery, and the activity injected into each artery was proportional to the liver volume involved. For patients with measurable disease and additional small satellite tumors, activity calculation was based on the measurable disease.

When at least 2 liver segments were spared from treatment (typically, in a lobar approach), the Partition Model was used to determine the patient-specific prescribed activities of SIR-Spheres provided the patient had discrete and measurable tumors that could be delimited on the CT/MRI scan. When the patient was not cirrhotic and the amount of targeted volume was less than 60% of the total liver volume, the Model was used to calculate an activity that would result in the tumor absorbing 120 Gy irrespective of the dose delivered to the non-tumoral liver. Conversely, when the patient was cirrhotic or the amount of targeted volume (tumor plus non-tumoral liver) was equal to or more than 60% of the total liver volume, the Model was used to determine the activity that would result in the non-tumoral liver absorbing not more than 40 Gy.

Within 24 hours after the administration of SIR-Spheres, Y-90 PET/CT was performed to detect positron emission from the yttrium-90, in order to confirm the placement of SIR-Spheres in the targeted lesions, to exclude non-targeted delivery of SIR-Spheres, and to calculate the actual dose of radiation delivered to tumors and non-tumoral liver.

## Secondary study endpoints and additional sample size considerations

Secondary endpoints were overall response rate (ORR, percentage of patients whose best overall response [BOR] was complete or partial response), disease control rate (DCR, percentage of patients whose BOR was complete or partial response or stable disease), duration of response (DoR, time from SIRT to first documented tumor progression or death in patients with a BOR of complete or partial response), time to progression (TTP, time from SIRT to tumor progression), progression free survival (PFS, time from SIRT to tumor progression or death from any cause), and pattern of progression (proportion of patients with the event of tumor progression triggered by i) growth of existing tumor lesions only; ii) occurrence of new lesions inside the liver irrespective of previous criterion; and iii) occurrence of new lesions outside the liver irrespective of the two prior criteria). Exploratory objectives were overall survival (OS, time from SIRT to death); efficacy based on tumor- and blood-based biomarkers (baseline tumor cell programmed death ligand 1 (PD-L1) expression); impact of ALBI score on safety and efficacy; and health-related quality of life (HRQoL).

Although the primary objective was safety, the study should also inform eventual phase randomized clinical trial to explore the clinical benefit of combining nivolumab with transarterial therapies. With sufficient follow up for 40 subjects, this will allow to have a stable estimate of TTP. Considering an expected median TTP of 3 months with SIRT alone, a sample size was calculated with TTP as readout and the following statistical assumptions that reflect the hypothesis-generating nature of this trial: HR of 0.5 for TTP, 80% power to detect the difference in a 1-sided log-rank test and an error alpha of 0.05. This yielded a sample size of 72 patients that resulted in the need to have 36 patients treated with nivolumab and SIRT. Considering a 10% of screening failures due to technical contraindications for SIRT based on high lung shunt or unfavorable arterial vascularization, a sample size of 40 patients would allow to detect a relevant signal of incremental efficacy.

## Requisites for continuing treatment with Nivolumab beyond progression.

In the absence of clinical deterioration, patients were allowed to continue study therapy after an initial investigator-assessed RECIST 1.1 defined progression as long as they met the following criteria:

- Investigator assessed clinical benefit
- Subject was tolerating nivolumab
- Treatment beyond progression did not delay an imminent intervention to prevent serious complications of disease progression (eg, CNS metastases)
- Subject provided written informed consent prior to receiving any additional nivolumab.

The decision to start or continue treatment with nivolumab beyond initial investigator-assessed progression was eventually discussed with the Principal Investigator and documented in the study records. Patients should discontinue nivolumab upon further evidence of further progression, defined as an additional 10% or greater increase in tumor burden from time of initial progression (including all target lesions and new measurable lesions). If progression occurred in the first evaluation after SIRT before nivolumab treatment had started, this increase should be 20% or greater for the first post-nivolumab evaluation and 10% or greater thereafter. Nivolumab treatment was discontinued permanently upon documentation of further progression.

For statistical analyses that include the investigator-assessed progression date, patients who continued treatment beyond initial investigator-assessed, RECIST 1.1- defined progression were considered to have investigator-assessed progressive disease at the time of the initial progression event.

## References

- [1] Sangro B, Gil-Alzugaray B, Rodriguez J, Sola I, Martinez-Cuesta A, Viudez A, et al. Liver disease induced by radioembolization of liver tumors: Description and possible risk factors.

- Cancer 2008;112:1538–46. <https://doi.org/10.1002/cncr.23339>.
- [2] Gil-Alzugaray B, Chopitea A, Iñarrairaegui M, Bilbao JI, Rodriguez-Fraile M, Rodriguez J, et al. Prognostic factors and prevention of radioembolization-induced liver disease. *Hepatology* 2013;57:1078–87. <https://doi.org/10.1002/hep.26191>.
- [3] EuroQol--a new facility for the measurement of health-related quality of life. *Health Policy* 1990;16:199–208. [https://doi.org/10.1016/0168-8510\(90\)90421-9](https://doi.org/10.1016/0168-8510(90)90421-9).
- [4] Pickard AS, Neary MP, Cella D. Estimation of minimally important differences in EQ-5D utility and VAS scores in cancer. *Health Qual Life Outcomes* 2007;5:70. <https://doi.org/10.1186/1477-7525-5-70>.

## Supplemental Tables

Table S1. Characteristics of the SIRT procedure.

|                                          | All patients      | BCLC-B2 substage   | Unilobar tumors with portal vein invasion |
|------------------------------------------|-------------------|--------------------|-------------------------------------------|
| Number of patients                       | 42                | 31                 | 11                                        |
| Total tumor volume (ml), median (range)  | 182.5 (12 – 1950) | 134 (65 – 336)     | 217 (50 – 484)                            |
| Total liver volume (ml), median (range)  | 1770 (110 – 2700) | 1765 (1340 – 2014) | 1775 (1487 – 2007)                        |
| Target liver volume (ml), median (range) | 955 (170 – 2671)  | 970 (698 – 1505)   | 941 (650 – 1022)                          |
| Tumor involvement (%), median (range)    | 10.2 (1.0 – 74.7) | 9.1 (1.0 – 74.7)   | 11.5 (2.3 – 41.0)                         |
| Coil-embolized arteries, n (%)           | 12 (28.6)         | 8 (25.8)           | 4 (36.4)                                  |
| Flow redistribution, n (%)               | 10 (23.8)         | 7 (22.6)           | 3 (27.3)                                  |
| MAA injection sites, n (%)               |                   |                    |                                           |
| 1                                        | 18 (42.8)         | 14 (45.2)          | 4 (36.4)                                  |
| 2                                        | 18 (42.8)         | 12 (38.7)          | 6 (54.5)                                  |
| 3                                        | 6 (14.2)          | 5 (16.1)           | 1 (9.1)                                   |

|                                              |                 |                   |                   |                   |
|----------------------------------------------|-----------------|-------------------|-------------------|-------------------|
| Tumor MAA uptake, n (%)                      | Good            | 28 (66.7)         | 20 (64.5)         | 8 (72.7)          |
|                                              | Moderate        | 12 (28.6)         | 10 (32.3)         | 2 (18.2)          |
|                                              | Poor            | 2 (4.8)           | 1 (3.2)           | 1 (9.1)           |
| Tumor/NonTumor ratio, median (range)         |                 | 2.2 (0.5 – 7.7)   | 2.3 (0.5 – 7.7)   | 1.8 (0.6 – 3.4)   |
| Lung shunt fraction (%), median (range)      |                 | 6 (2 – 18)        | 5 (4 – 9)         | 6 (2 – 18)        |
| Activity calculation instrument, n (%)       | BSA method      | 10 (23.8)         | 8 (25.8)          | 2 (18.2)          |
|                                              | Partition Model | 32 (76.2)         | 23 (74.2)         | 9 (81.8)          |
| Treatment Design, n (%)                      | Sublobar        | 7 (16.7)          | 5 (16.1)          | 2 (18.2)          |
|                                              | Right           | 18 (42.9)         | 13 (41.9)         | 5 (45.5)          |
|                                              | Left            | 5 (11.9)          | 2 (6.5)           | 3 (27.3)          |
|                                              | Right extended  | 3 (7.1)           | 3 (9.7)           | -                 |
|                                              | Left extended   | 3 (7.1)           | 3 (9.7)           | -                 |
|                                              | Whole liver     | 6 (14.3)          | 5 (16.1)          | 1 (9.1)           |
| Injected Y90 activity (GBq)*, median (range) |                 | 1.3 (0.64 – 3.40) | 1.2 (0.64 – 3.40) | 1.5 (0.80 – 2.10) |



|                                                                                     |           |           |          |
|-------------------------------------------------------------------------------------|-----------|-----------|----------|
| Extrahepatic deposition of radioactivity on abdominal organs detected on Y90 PET-CT | 0         | 0         | 0        |
| Aim of Y90 activity calculation, n (%)                                              |           |           |          |
| Tumor-targeted dose                                                                 | 25 (59.5) | 17 (54.8) | 8 (72.7) |
| Liver-targeted dose                                                                 | 17 (40.5) | 14 (45.2) | 3 (27.3) |

\* More than 99% of the prescribed Y90 activity was actually injected in all patients.

**Table S2. Individual events leading to nivolumab dose delays observed in 18 patients.**

| Event                                     | SAE | Grade | Related to SIRT | Related to nivolumab (IMAE) |
|-------------------------------------------|-----|-------|-----------------|-----------------------------|
| <i>Metabolism and nutrition disorders</i> |     |       |                 |                             |
| Diabetes mellitus                         | Yes | 3     | No              | Yes                         |
| Hyperosmolar nonketotic syndrome          | Yes | 3     | No              | Yes                         |
| Thyroiditis                               | No  | 1     | No              | Yes                         |
| <i>Gastrointestinal disorders</i>         |     |       |                 |                             |
| Ascites                                   | No  | 3     | No              | No                          |
| Ascites                                   | Yes | 2     | No              | No                          |
| Diarrhea                                  | Yes | 3     | No              | Yes                         |
| Diarrhea                                  | No  | 2     | No              | Yes                         |
| Diarrhea                                  | No  | 1     | No              | No                          |
| Hematemesis                               | Yes | 3     | No              | No                          |
| <i>General disorders</i>                  |     |       |                 |                             |
| Pyrexia                                   | Yes | 2     | No              | No                          |
| Pyrexia                                   | Yes | 2     | No              | No                          |
| Dizziness                                 | No  | 1     | No              | No                          |
| <i>Hepatobiliary disorders</i>            |     |       |                 |                             |
| Hyperbilirubinemia                        | No  | 3     | Yes             | No                          |
| ALT increased                             | No  | 3     | No              | Yes                         |
| ALT increased                             | No  | 2     | No              | Yes                         |
| ALT increased                             | No  | 1     | No              | No                          |
| AST increased                             | No  | 2     | No              | Yes                         |
| AST increased                             | No  | 2     | No              | No                          |
| Bilirubin increased                       | No  | 2     | No              | No                          |
| Bilirubin increased                       | No  | 1     | Yes             | No                          |
| Bilirubin increased                       | No  | 1     | No              | Yes                         |
| Hepatic function abnormal                 | Yes | 2     | No              | No                          |
| Hepatic function abnormal                 | No  | 1     | No              | No                          |
| Hepatic encephalopathy                    | Yes | 2     | No              | No                          |
| Hepatic encephalopathy                    | No  | 2     | No              | No                          |

|                                                        |     |   |    |     |
|--------------------------------------------------------|-----|---|----|-----|
| <i>Infections and infestations</i>                     |     |   |    |     |
| Chlostridium bacteremia                                | Yes | 3 | No | No  |
| Peritonitis bacterial                                  | No  | 3 | No | No  |
| Urinary tract infection                                | Yes | 2 | No | No  |
| Escherichia coli infection                             | No  | 1 | No | No  |
| Lower respiratory tract infection                      | No  | 1 | No | No  |
| Peritonitis                                            | Yes | 1 | No | No  |
| Pneumonia                                              | No  | 1 | No | No  |
| <i>Musculoskeletal and connective tissue disorders</i> |     |   |    |     |
| Rib fracture                                           | No  | 1 | No | No  |
| Back pain                                              | No  | 1 | No | Yes |
| <i>Renal and urinary disorders</i>                     |     |   |    |     |
| Renal impairment                                       | Yes | 3 | No | Yes |
| Tubulointerstitial nephritis                           | Yes | 3 | No | Yes |
| Creatinine increased                                   | No  | 2 | No | Yes |
| Creatinine increased                                   | No  | 1 | No | Yes |
| Creatinine increased                                   | No  | 1 | No | No  |

SAE: serious adverse event. IMAE: immune-mediated adverse event. Some patients developed more than one AE leading to nivolumab dose delays.

**Table S3. Individual adverse events that led to a permanent discontinuation of nivolumab in 6 patients.**

| AE                            | SAE | Grade | Related to SIRT | Related to Nivolumab (IMAE) |
|-------------------------------|-----|-------|-----------------|-----------------------------|
| Liver abscess                 | Yes | 3     | Yes             | No                          |
| Hyperbilirubinemia            | No  | 2     | Yes             | No                          |
| Diarrhea                      | No  | 2     | No              | Yes                         |
| Postoperative wound infection | Yes | 3     | No              | No                          |
| Bile duct obstruction         | Yes | 3     | No              | No                          |
| Hepatic encephalopathy        | Yes | 2     | No              | No                          |
| Liver abscess                 | No  | 3     | No              | No                          |

IMAE: immune-mediated adverse event.

**Table S4. Immune-mediated AEs (IMAE) requiring corticosteroids observed in 8 patients.**

| Patient | Organ class      | AE                        | SAE | Grade |
|---------|------------------|---------------------------|-----|-------|
| 1       | Endocrine        | Diabetes mellitus         | Yes | 3     |
| 2       | Endocrine        | Hyperthyroidism           | No  | 1     |
| 3       | Endocrine        | Hypothyroidism            | No  | 1     |
|         | Endocrine        | Thyroiditis               | No  | 1     |
| 4       | Hepatobiliary    | Immune hepatitis          | No  | 3     |
| 5       | Gastrointestinal | Diarrhea                  | Yes | 3     |
| 6       | Hepatobiliary    | AST & ALT increased       | No  | 2     |
| 7       | Hepatobiliary    | AST & ALT increased       | No  | 2     |
| 8       | Hepatobiliary    | ALT & Bilirubin increased | No  | 2     |

**Table S5. Response rate by investigator-assessed RECIST 1.1 criteria according to baseline characteristics.**

|                     |             | <b>N</b> | <b>Responders</b> | <b>%</b> |
|---------------------|-------------|----------|-------------------|----------|
| Subgroup            | BCLC-B2     | 30       | 13                | 43.3     |
|                     | Lobar PVI   | 11       | 4                 | 36.4     |
| ECOG                | 0           | 37       | 15                | 40.5     |
|                     | 1           | 4        | 2                 | 50.0     |
| Etiology            | Uninfected  | 31       | 13                | 41.9     |
|                     | Viral       | 10       | 4                 | 40.0     |
| Alpha-fetoprotein * | ≤ 400 ng/ml | 28       | 11                | 39.3     |
|                     | > 400 ng/ml | 12       | 6                 | 50.0     |
| Child-Pugh score    | 5           | 35       | 15                | 42.9     |
|                     | 6           | 6        | 2                 | 33.3     |
| ALBI grade          | 1           | 20       | 8                 | 40.0     |
|                     | 2           | 21       | 9                 | 42.9     |
| Any prior treatment | No          | 21       | 10                | 47.6     |
|                     | Yes         | 20       | 7                 | 35.0     |
| Prior TACE          | No          | 30       | 14                | 46.7     |
|                     | Yes         | 11       | 3                 | 27.3     |
| Prior Sorafenib     | No          | 36       | 16                | 44.4     |
|                     | Yes         | 5        | 1                 | 20.0     |

|                      |                     |    |    |      |
|----------------------|---------------------|----|----|------|
| Activity calculation | Liver-targeted dose | 17 | 4  | 23.5 |
|                      | Tumor-targeted dose | 24 | 13 | 54.2 |

\* baseline values were not available for one patient

**Table S6. Time to progression and overall survival according to patient and treatment baseline characteristics.**

|                          |                     | N  | Time to progression, median (95% CI) | p     | N  | Progression-free survival, median (95% CI) | p     | N  | Overall survival, median (95% CI) | p     |
|--------------------------|---------------------|----|--------------------------------------|-------|----|--------------------------------------------|-------|----|-----------------------------------|-------|
| Tumor burden             | BCLC-B2             | 30 | 10.61 (0.91 – 20.31)                 | 0.120 | 30 | 10.61 (0.73 – 20.49)                       | 0.115 | 31 | 22.04 (18.59 – 25.49)             | 0.765 |
|                          | Lobar PVI           | 11 | 4.79 (0.29 – 9.29)                   |       | 11 | 4.79 (0.29 – 9.29)                         |       | 11 | 19.91 (1.74 – 38.07)              |       |
| Alpha-fetoprotein        | ≤ 400 ng/ml         | 28 | 9.16 (0.00 – 23.25)                  | 0.038 | 28 | 9.16 (0.00 – 23.64)                        | 0.060 | 29 | 22.57 (17.89 – 27.24)             | 0.023 |
|                          | > 400 ng/ml         | 12 | 3.28 (0.94 – 5.62)                   |       | 12 | 3.28 (0.94 – 5.62)                         |       | 12 | 13.04 (1.27 – 24.81)              |       |
| ALBI grade               | 1                   | 20 | 9.16 (5.10 – 13.22)                  | 0.855 | 20 | 9.00 (5.20 – 12.79)                        | 0.788 | 21 | 22.14 (17.05 – 27.22)             | 0.253 |
|                          | 2                   | 21 | 7.81 (5.90 – 9.)                     |       | 21 | 7.09 (3.06 – 11.12)                        |       | 21 | 19.91 (9.26 – 30.55)              |       |
| Y90 activity calculation | Tumor-targeted dose | 24 | 16.62 (0.00 - 35.93)                 | 0.09  | 24 | 16.62 (0.00 – 36.22)                       | 0.084 | 25 | 22.57 (18.32 – 26.82)             | 0.090 |
|                          | Liver-targeted dose | 17 | 6.89 (5.66 - 8.13)                   |       | 17 | 6.89 (5.66 – 8.13)                         |       | 17 | 17.24 (8.94 – 25.55)              |       |



## Supplemental figures

### Figure S1. Waterfall plot showing maximum changes in tumor size of target lesions.

It is important to bear in mind when reading this figure that SIRT results in different doses of radiation absorbed by different tumor nodules.

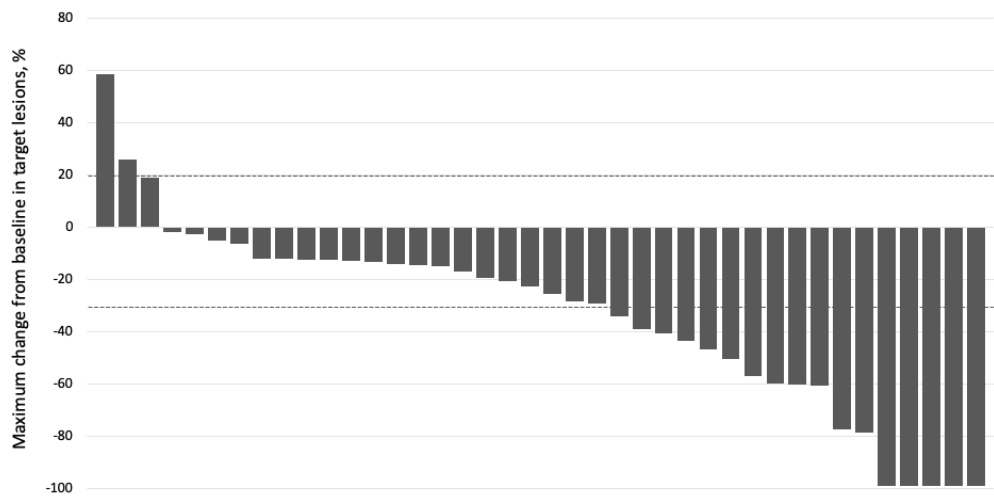

**Figure S2. Time to progression per investigator assessment according to baseline tumor burden.**

BCLC-B2 (median 10.6 months, 95%CI 0.9 – 20.3) vs. lobar PVI (median 4.8 months, 95%CI 0.3 – 9.3), p=0.12.

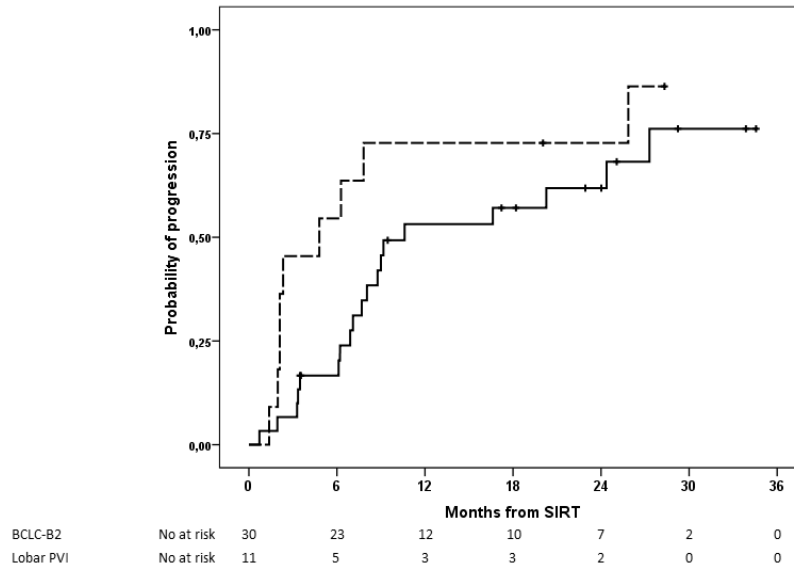

**Figure S3. Time to progression per investigator assessment according to Y90 activity calculation.**

Tumor-targeted dose (median 16.6 months, 95%CI 0.0 - 35.9) vs. liver-targeted dose (median 6.9 months, 95%CI 5.7 - 8.1),  $p=0.09$ .

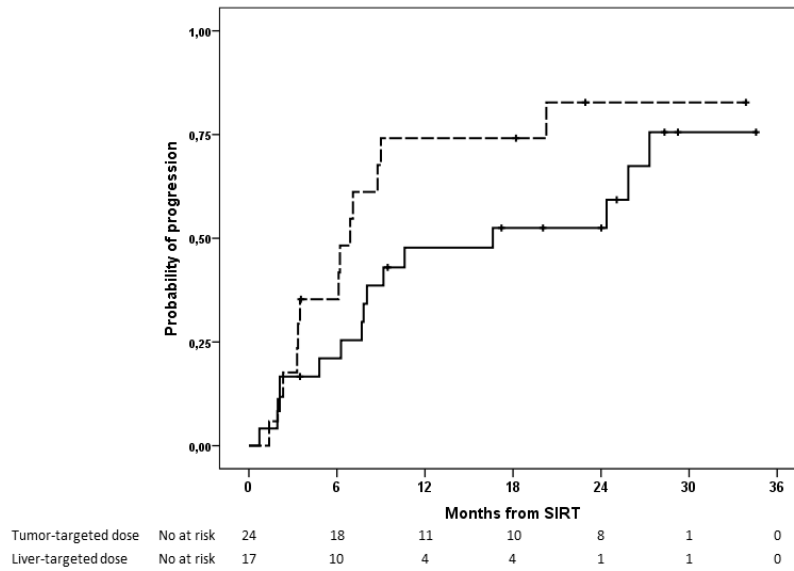

**Figure S4. Time to progression per investigator assessment according to baseline AFP.**

AFP  $\leq$  400 ng/ml (median 9.2 months, 95%CI 0.0 – 23.2) vs. AFP > 400 ng/ml (median 3.3 months, 95%CI 0.9 – 5.6),  $p=0.038$ .

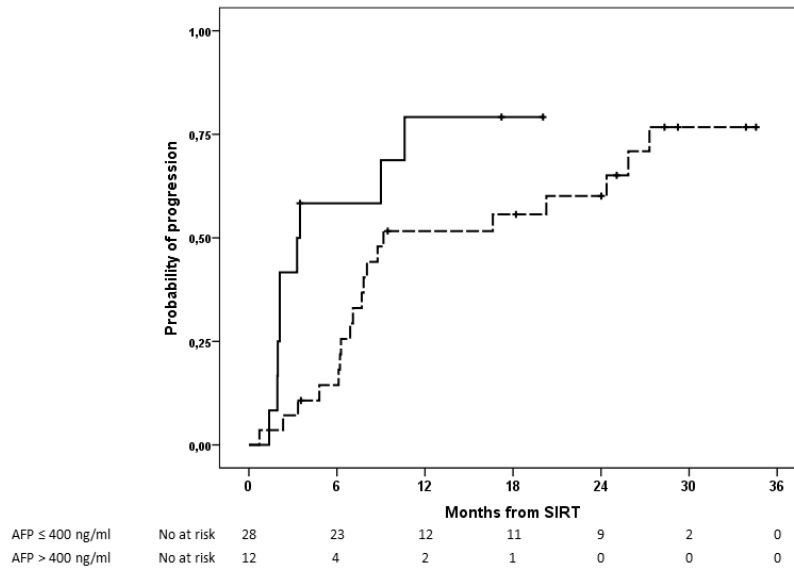

**Figure S5. Progression-free survival per investigator assessment.**  
PFS rates at 1 and 2 years were 42% and 37%, respectively.

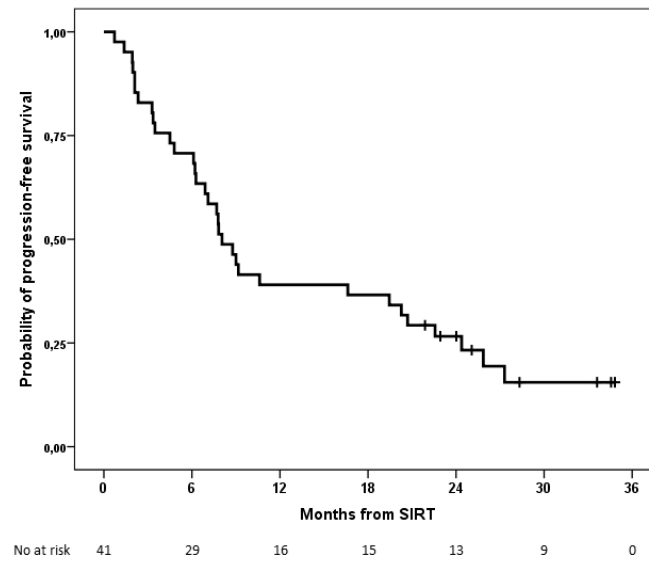

**Figure S6. Overall survival according to baseline AFP levels.**  
 AFP  $\leq$  400 ng/ml (median 22.6 months, 95%CI 17.9 – 27.2) vs. AFP > 400 ng/ml (median 13.0 months, 95%CI 1.3 – 24.8),  $p=0.023$ .

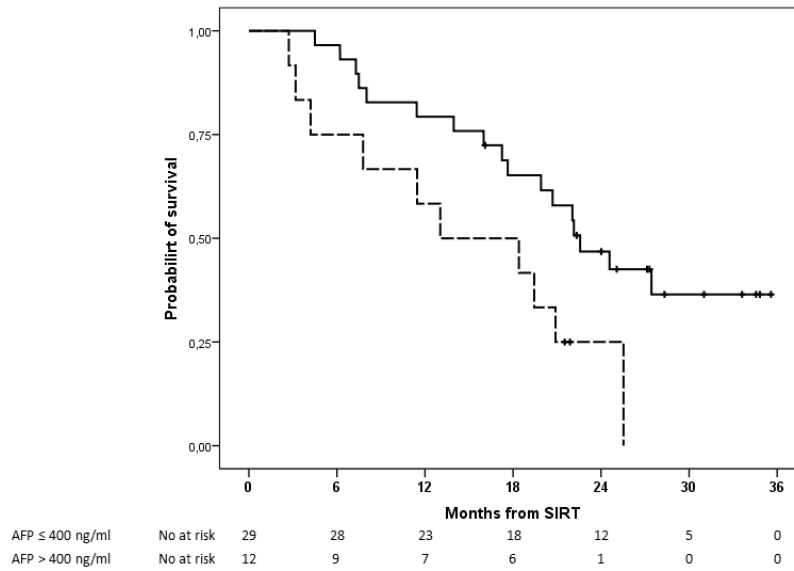

**Figure S7. Overall survival according to the aim of Y90 activity calculation.** Tumor-targeted dose (median 22.6 months, 95%CI 18.3 – 26.8) vs. liver-targeted dose (median 17.2 months, 95%CI 8.9 – 25.5),  $p=0.09$ .

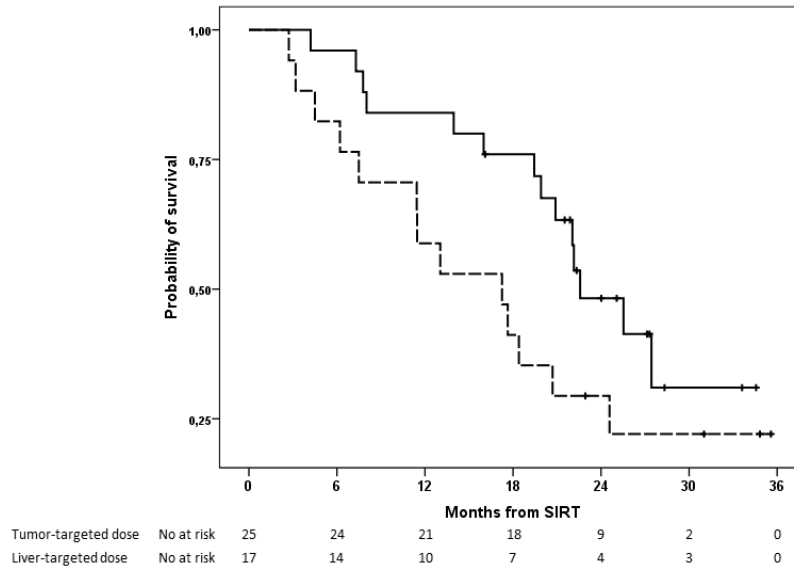

Supplement: jitc-2022-005457supp001.pdf [file jitc-2022-005457supp001.pdf]
